# Supplementary material for: Pretreatment of furfural residues with switchable butadiene sulfone in the sugarcane bagasse biorefinery
Source: Royal Society of Chemistry journal article supplement (doi:10.1039/c3gc42632g), 2014-01-01
Supplement: c3gc42632g1.pdf [file c3gc42632g1.pdf]

## Pretreatment of furfural residues with switchable butadiene sulfone in the sugarcane bagasse biorefinery

### Supplementary Information

J. Atilio de Frias<sup>1</sup> and Hao Feng<sup>1,2\*</sup>

<sup>1</sup>Department of Agricultural and Biological Engineering, University of Illinois at Urbana-Champaign, Urbana, Illinois 61801, USA.

<sup>2</sup>Department of Food Science and Human Nutrition, University of Illinois at Urbana-Champaign, Urbana, Illinois 61801, USA.

\*Corresponding Author. E-mail: [haofeng@illinois.edu](mailto:haofeng@illinois.edu)

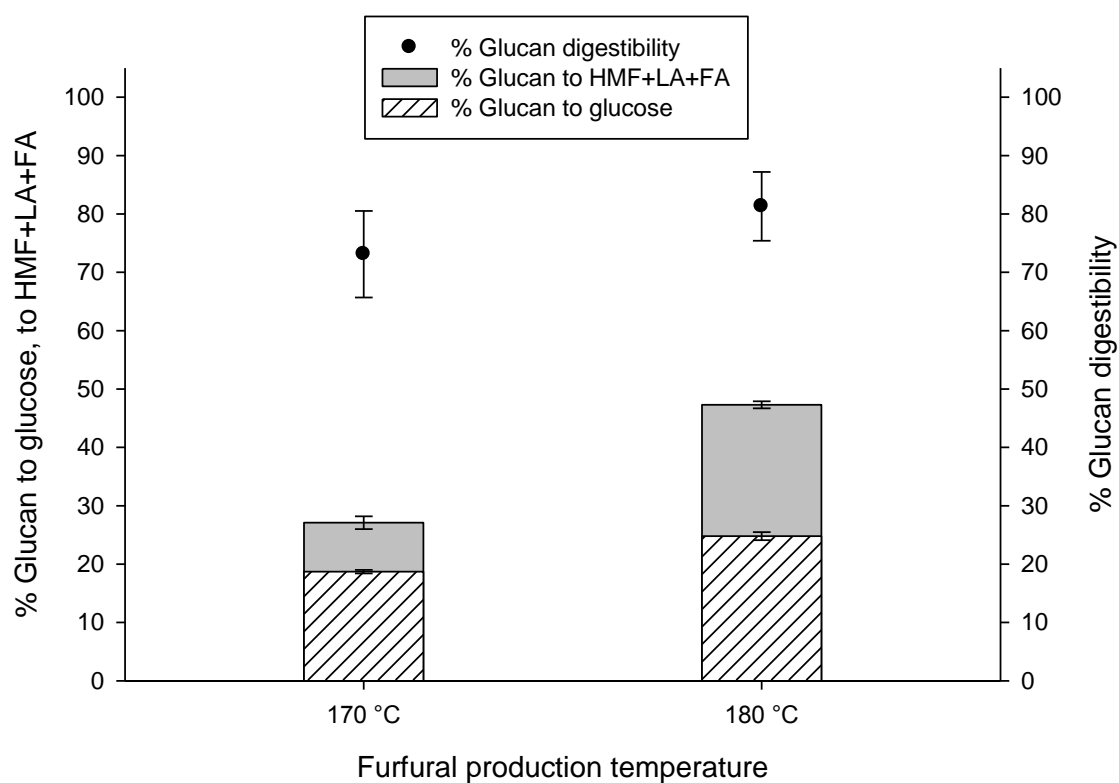

**Fig. S1** Percentage of the glucan in sugarcane bagasse, converted to glucose and HMF+LA+FA after acid-catalyzed production of furfural at 170 °C and 180 °C for 10 min, and before pretreatment with butadiene sulfone-water. Overlaid in the figure are the enzymatic digestibility percentages at 72 h and 50 °C of the glucan in the residues without pretreatment.
